# Supplementary material
Source: MDPI journal article supplement (https://www.mdpi.com/2073-4441/15/5/953)
Supplement: s1 [file s1]

**Table S1 Function traits of metazooplankton**

| Species                          | Body length<br>(mm) | Feeding type<br>(categorical<br>variable) | Predator defense<br>(categorical variable) | Habitat type<br>(categorical<br>variable) | Trophic group<br>(categorical<br>variable) |
|----------------------------------|---------------------|-------------------------------------------|--------------------------------------------|-------------------------------------------|--------------------------------------------|
| <i>Moina micrura</i>             | 0.68                | <i>Daphnia</i>                            | Rapid swimming                             | Pelagic                                   | Herbivorous                                |
| <i>Ceriodaphnia quadrangula</i>  | 0.5                 | <i>Daphnia</i>                            | Rapid swimming                             | Pelagic                                   | Herbivorous                                |
| <i>Alona diaphana</i>            | 0.4                 | <i>Chydorus</i>                           | Not moving                                 | Litoral                                   | Herbivorous                                |
| <i>Alona quadrangularis</i>      | 0.32                | <i>Chydorus</i>                           | Not moving                                 | Litoral                                   | Herbivorous                                |
| <i>Alona eximia</i>              | 0.38                | <i>Chydorus</i>                           | Not moving                                 | Litoral                                   | Herbivorous                                |
| <i>Pleuroxus hamulatus</i>       | 0.43                | <i>Chydorus</i>                           | Not moving                                 | Litoral                                   | Herbivorous                                |
| <i>Bosmina coregoni</i>          | 0.33                | <i>Bosmina</i>                            | Reduced swimming                           | Pelagic                                   | Herbivorous                                |
| <i>Bosmina longirostris</i>      | 0.29                | <i>Bosmina</i>                            | Reduced swimming                           | Pelagic                                   | Herbivorous                                |
| <i>Bosmina coregoni</i> Baird    | 0.31                | <i>Bosmina</i>                            | Reduced swimming                           | Pelagic                                   | Herbivorous                                |
| <i>Bosminopsis deitersi</i>      | 0.38                | <i>Bosmina</i>                            | Reduced swimming                           | Litoral                                   | Herbivorous                                |
| <i>Diaphanosoma chankensis</i>   | 0.68                | <i>Sida</i>                               | Pausing and jumping                        | Pelagic                                   | Herbivorous                                |
| <i>Diaphanosoma brachyurum</i>   | 0.64                | <i>Sida</i>                               | Pausing and jumping                        | Pelagic                                   | Herbivorous                                |
| <i>Daphnia magna</i>             | 0.48                | <i>Sida</i>                               | Pausing and jumping                        | Pelagic                                   | Omnivorous                                 |
| <i>Daphnia longispina</i>        | 0.3                 | <i>Sida</i>                               | Pausing and jumping                        | Pelagic                                   | Omnivorous                                 |
| <i>Mesocyclops leuckarti</i>     | 0.8                 | <i>Raptorial</i>                          | Pausing and jumping                        | Pelagic                                   | Carnivorous                                |
| <i>Microcyclops varicans</i>     | 0.65                | <i>Raptorial</i>                          | Pausing and jumping                        | Litoral                                   | Herbivorous                                |
| <i>Microcyclops javanus</i>      | 0.71                | <i>Raptorial</i>                          | Pausing and jumping                        | Litoral                                   | Herbivorous                                |
| <i>Cyclops vicinus</i>           | 1.13                | <i>Raptorial</i>                          | Pausing and jumping                        | Pelagic                                   | Omnivorous                                 |
| <i>Cyclops. sp</i>               | 1.2                 | <i>Raptorial</i>                          | Pausing and jumping                        | Pelagic                                   | Omnivorous                                 |
| <i>Limnocletodes behningi</i>    | 1.2                 | <i>Raptorial</i>                          | Pausing and jumping                        | Pelagic                                   | Omnivorous                                 |
| <i>Limnocletodes. sp</i>         | 1.1                 | <i>Raptorial</i>                          | Pausing and jumping                        | Pelagic                                   | Omnivorous                                 |
| <i>Rotaria citrina</i>           | 0.36                | <i>Bosmina</i>                            | Rapid swimming                             | Pelagic                                   | Omnivorous                                 |
| <i>Rotaria rotatoria</i>         | 0.42                | <i>Raptorial</i>                          | Pausing and jumping                        | Pelagic                                   | Omnivorous                                 |
| <i>Dicranophorus caudatus</i>    | 0.24                | <i>Raptorial</i>                          | Pausing and jumping                        | Pelagic                                   | Carnivorous                                |
| <i>Colurella uncinata</i>        | 0.11                | <i>Bosmina</i>                            | Not moving                                 | Pelagic                                   | Herbivorous                                |
| <i>Colurella obtusa</i>          | 0.12                | <i>Bosmina</i>                            | Not moving                                 | Pelagic                                   | Herbivorous                                |
| <i>Brachionus quadridentatus</i> | 0.24                | <i>Chydorus</i>                           | Rapid swimming                             | Litoral                                   | Omnivorous                                 |
| <i>Brachionus calyciflorus</i>   | 0.21                | <i>Chydorus</i>                           | Rapid swimming                             | Litoral                                   | Omnivorous                                 |
| <i>Brachionus forficula</i>      | 0.24                | <i>Chydorus</i>                           | Rapid swimming                             | Litoral                                   | Omnivorous                                 |
| <i>Brachionus angularis</i>      | 0.22                | <i>Chydorus</i>                           | Rapid swimming                             | Litoral                                   | Omnivorous                                 |
| <i>Brachionus diversicornis</i>  | 0.23                | <i>Chydorus</i>                           | Rapid swimming                             | Litoral                                   | Omnivorous                                 |
| <i>Trichocerca pusilla</i>       | 0.12                | <i>Bosmina</i>                            | Not moving                                 | Pelagic                                   | Herbivorous                                |
| <i>Trichocerca longiseta</i>     | 0.13                | <i>Bosmina</i>                            | Not moving                                 | Pelagic                                   | Herbivorous                                |
| <i>Trichocerca bicristata</i>    | 0.15                | <i>Bosmina</i>                            | Not moving                                 | Pelagic                                   | Herbivorous                                |
| <i>Trichocerca lophoessa</i>     | 0.13                | <i>Bosmina</i>                            | Not moving                                 | Pelagic                                   | Herbivorous                                |
| <i>Trichocerca similis</i>       | 0.12                | <i>Bosmina</i>                            | Not moving                                 | Pelagic                                   | Herbivorous                                |
| <i>Trichocerca weberi</i>        | 0.15                | <i>Bosmina</i>                            | Not moving                                 | Pelagic                                   | Herbivorous                                |
| <i>Euchlanis pellucida</i>       | 0.19                | <i>Stationary</i>                         | Not moving                                 | Litoral                                   | Herbivorous                                |

|                      |      |                              |                     |         |             |
|----------------------|------|------------------------------|---------------------|---------|-------------|
|                      |      | <i>suspension</i>            |                     |         |             |
| Euchlanis triquetra  | 0.22 | <i>Stationary suspension</i> | Not moving          | Litoral | Herbivorous |
| Epiphanes senla      | 0.14 | <i>Bosmina</i>               | Not moving          | Litoral | Herbivorous |
| Lecane buna          | 0.24 | <i>Bosmina</i>               | Not moving          | Pelagic | Omnivorous  |
| Lecane ungulata      | 0.27 | <i>Bosmina</i>               | Not moving          | Pelagic | Omnivorous  |
| Lecane nodosa        | 0.22 | <i>Bosmina</i>               | Not moving          | Pelagic | Omnivorous  |
| Lecane ludwigu       | 0.25 | <i>Bosmina</i>               | Not moving          | Pelagic | Omnivorous  |
| Lecane tenuiseta     | 0.26 | <i>Bosmina</i>               | Not moving          | Pelagic | Omnivorous  |
| Monostyla unguitata  | 0.31 | <i>Stationary suspension</i> | Not moving          | Pelagic | Omnivorous  |
| Monostyla lunaris    | 0.34 | <i>Stationary suspension</i> | Not moving          | Pelagic | Omnivorous  |
| Monostyla bulla      | 0.38 | <i>Stationary suspension</i> | Not moving          | Pelagic | Omnivorous  |
| Monostyla pyriformis | 0.29 | <i>Stationary suspension</i> | Not moving          | Pelagic | Omnivorous  |
| Monostyla hamata     | 0.34 | <i>Stationary suspension</i> | Not moving          | Pelagic | Omnivorous  |
| Monostyla elachis    | 0.36 | <i>Stationary suspension</i> | Not moving          | Pelagic | Omnivorous  |
| Lepadella apsidea    | 0.12 | <i>Bosmina</i>               | Not moving          | Pelagic | Omnivorous  |
| Lepadella ovalis     | 0.13 | <i>Bosmina</i>               | Not moving          | Pelagic | Omnivorous  |
| Keratella serrulata  | 0.08 | <i>Bosmina</i>               | Not moving          | Pelagic | Omnivorous  |
| Keratella valga      | 0.09 | <i>Bosmina</i>               | Not moving          | Pelagic | Omnivorous  |
| Keratella quadrata   | 0.07 | <i>Bosmina</i>               | Not moving          | Pelagic | Omnivorous  |
| Keratella cochlearis | 0.08 | <i>Bosmina</i>               | Not moving          | Pelagic | Omnivorous  |
| Filinia longiseta    | 0.19 | <i>Raptorial</i>             | Pausing and jumping | Pelagic | Omnivorous  |
| Filinia passn        | 0.21 | <i>Raptorial</i>             | Pausing and jumping | Pelagic | Omnivorous  |
| Dissotrocha aculeate | 0.38 | <i>Bosmina</i>               | Rapid swimming      | Pelagic | Herbivorous |
| Asplanchna priodonta | 0.64 | <i>Bosmina</i>               | Not moving          | Pelagic | Herbivorous |
| Trichotria letractis | 0.29 | <i>Chydorus</i>              | Rapid swimming      | Pelagic | Omnivorous  |
| Eothinia elongata    | 0.33 | <i>Chydorus</i>              | Rapid swimming      | Pelagic | Omnivorous  |

**Table S2 Cyanobacteria abundance and biomass at each sampling site**

| Site | July                                       |                   | October                                    |                   | January                                    |                   | May                                        |                   |
|------|--------------------------------------------|-------------------|--------------------------------------------|-------------------|--------------------------------------------|-------------------|--------------------------------------------|-------------------|
|      | Abundance<br>( $\times$<br>$10^5$ cells/L) | Biomass<br>(mg/L) |
| S1   | 31.24                                      | 2.111             | 2.71                                       | 0.011             | 0.24                                       | 0.017             | 3.09                                       | 0.118             |
| S2   | 134.35                                     | 9.489             | 5.11                                       | 0.172             | 0.02                                       | 0.001             | 2.83                                       | 0.139             |
| S3   | 132.11                                     | 9.379             | 4.13                                       | 0.339             | 0                                          | 0                 | 1.59                                       | 0.046             |
| S4   | 63.62                                      | 4.447             | 4.36                                       | 0.297             | 0.31                                       | 0                 | 4.91                                       | 0.136             |
| S5   | 244.93                                     | 17.335            | 22.72                                      | 1.599             | 0.11                                       | 0.008             | 6.68                                       | 0.143             |
| S6   | 185.42                                     | 13.131            | 155.99                                     | 10.934            | 1.88                                       | 0.094             | 7.55                                       | 0.302             |
| S7   | 186.77                                     | 13.259            | 0.02                                       | 0.005             | 0.46                                       | 0.033             | 1.3                                        | 0.061             |
| S8   | 49.11                                      | 3.476             | 0.76                                       | 0.052             | 0.06                                       | 0.005             | 0.78                                       | 0.053             |
| S9   | 183.76                                     | 13.047            | 0.12                                       | 0.001             | 0.61                                       | 0.043             | 0.9                                        | 0.064             |
| S10  | 19.79                                      | 1.403             | 0.86                                       | 0.069             | 0                                          | 0                 | 0.28                                       | 0.013             |
| S11  | 33.64                                      | 2.388             | 0.67                                       | 0.047             | 0                                          | 0                 | 0.08                                       | 0.003             |
| S12  | 28.3                                       | 2.008             | 2                                          | 0.142             | 0.57                                       | 0.029             | 1.36                                       | 0.028             |
| S13  | 141.89                                     | 10.051            | 7.87                                       | 0.37              | 0.46                                       | 0.033             | 3.27                                       | 0.114             |
| S14  | 107.75                                     | 7.627             | 14.65                                      | 1.02              | 0.06                                       | 0.001             | 1.02                                       | 0.053             |
| S15  | 18.76                                      | 1.306             | 0.05                                       | 0                 | 0.15                                       | 0.014             | 0.11                                       | 0.002             |
| S16  | 19.13                                      | 1.358             | 0.06                                       | 0.006             | 0.17                                       | 0.008             | 0.11                                       | 0.015             |
| S17  | 28.33                                      | 2.012             | 0.09                                       | 0.004             | 0.09                                       | 0.002             | 0.12                                       | 0.007             |

**Table S3 Major species of cyanobacteria and metazooplankton**

| Metazooplankton |                           | Cyanobacteria                |
|-----------------|---------------------------|------------------------------|
| Category        | Species                   | Species                      |
| Cladocera       | Moina micrura             | Coelosphaerium kuetzingiarum |
|                 | Ceriodaphnia quadrangula  | Coelosphaerium.sp            |
|                 | Alona diaphana            | Spirulina major              |
|                 | Alona quadrangularis      | Phormidium beggiatoiforme    |
|                 | Alona eximia              | Phormidium allorgei          |
|                 | Pleuroxus hamulatus       | Phormidium beggiatoiforme    |
|                 | Bosmina coregoni          | Nostoc Vauch.sp              |
|                 | Bosmina longirostris      | Merismopedia.sp              |
|                 | Bosmina coregoni          | Merismopedia minima          |
|                 | Bosminopsis deitersi      | Merismopedia sinica          |
|                 | Diaphanosoma chankensis   | Anabaena circinalis          |
|                 | Diaphanosoma brachyurum   | Chroococcus minutus          |
| Copepods        | Daphnia magna             | Chroococcus tenax            |
|                 | Daphnia longispina        | Chroococcus minor            |
|                 | Mesocyclops leuckarti     | Chroococcus limneticus       |
|                 | Microcyclops varicans     | Anabaenopsis arnoldii        |
|                 | Microcyclops javanus      | Microcystis aeruginosa       |
|                 | Cyclops vicinus           | Microcystis flos-aquae       |
|                 | Cyclops. sp               |                              |
|                 | Limnocletodes behningi    |                              |
|                 | Limnocletodes. sp         |                              |
| Rotifer         | Rotaria citrina           |                              |
|                 | Rotaria rotatoria         |                              |
|                 | Dicranophorus caudatus    |                              |
|                 | Colurella uncinata        |                              |
|                 | Colurella obtusa          |                              |
|                 | Brachionus quadridentatus |                              |
|                 | Brachionus calyciflorus   |                              |
|                 | Brachionus forficula      |                              |
|                 | Brachionus angularis      |                              |
|                 | Brachionus diversicornis  |                              |
|                 | Trichocerca pusilla       |                              |
|                 | Trichocerca longiseta     |                              |
|                 | Trichocerca bicristata    |                              |
|                 | Trichocerca lophoessa     |                              |
|                 | Trichocerca similis       |                              |
|                 | Trichocerca weberi        |                              |
|                 | Euchlanis pellucida       |                              |

|  |                      |  |
|--|----------------------|--|
|  | Euchlanis triquetra  |  |
|  | Epiphanes senla      |  |
|  | Lecane buna          |  |
|  | Lecane unguolata     |  |
|  | Lecane nodosa        |  |
|  | Lecane ludwigu       |  |
|  | Lecane tenuiseta     |  |
|  | Monostyla unguitata  |  |
|  | Monostyla lunaris    |  |
|  | Monostyla bulla      |  |
|  | Monostyla pyriformis |  |
|  | Monostyla hamata     |  |
|  | Monostyla elachis    |  |
|  | Lepadella apsida     |  |
|  | Lepadella ovalis     |  |
|  | Keratella serrulata  |  |
|  | Keratella valga      |  |
|  | Keratella quadrata   |  |
|  | Keratella cochlearis |  |
|  | Filinia longiseta    |  |
|  | Filinia passn        |  |
|  | Dissotrocha aculeate |  |
|  | Asplanchna priodonta |  |
|  | Trichotria letractis |  |
|  | Eothinia elongata    |  |
